# Supplementary material
Source: publisher site journal article supplement (https://spandidos-publications.com/2604/downloadSupplementary)
Supplement: Supplementary file 1 [file downloadSupplementary]

## Sheet: Table SIII
Table SIII. MiRNAs that have a significant effect on patients' disease-free survival.
Name	Hazard ratio	95% CI	P-value	False discovery rate
miR29b-1	0.467751	0.28-0.78	0.0039506	0.554706
miR1258	0.51048	0.32-0.82	0.0050704	0.554706
miR203a	1.92697	1.18-3.14	0.00844163	0.554706
miR363	0.527381	0.33-0.85	0.00872707	0.554706
miR301b	1.95129	1.18-3.22	0.00885404	0.554706
miR150	0.541967	0.34-0.86	0.00886023	0.554706
miR23a	1.96157	1.18-3.25	0.00903009	0.554706
miR29b-2	0.519596	0.31-0.88	0.0142663	0.766814
miR10b	0.572856	0.36-0.92	0.020134	0.774152
miR218-2	0.56763	0.35-0.92	0.0214633	0.774152
miR4742	1.77032	1.08-2.89	0.0228099	0.774152
miR223	0.586019	0.37-0.94	0.0266838	0.774152
miR1295a	0.597229	0.38-0.95	0.02834	0.774152
miR935	0.585017	0.36-0.95	0.0286676	0.774152
miR1248	1.76973	1.06-2.95	0.0290166	0.774152
miR152	1.7063	1.04-2.79	0.0327374	0.774152
miR29c	0.600997	0.38-0.96	0.0338659	0.774152
miR887	0.581232	0.35-0.97	0.0365325	0.774152
miR20b	0.590906	0.36-0.97	0.0366223	0.774152
miR27b	1.64155	1.03-2.62	0.0376112	0.774152
miR4709	0.594315	0.36-0.98	0.0424923	0.774152
miR204	0.61943	0.39-0.98	0.0428325	0.774152
miR4772	0.617524	0.39-0.99	0.0430605	0.774152
miR130b	1.66462	1.02-2.73	0.0432085	0.774152
miR26b	0.610768	0.37-1.00	0.0494003	0.804251
